# Supplementary material for: Characterization of a vaccine-elicited human antibody with sequence homology to VRC01-class antibodies that binds the C1C2 gp120 domain
Source: PubMed Central journal article supplement — Sci Adv. 2022 May 4;8(18):eabm3948. doi: 10.1126/sciadv.abm3948 (PMC9067929; doi:10.1126/sciadv.abm3948), 2022-05-04
Supplement: sciadv.abm3948_sm.pdf [file sciadv.abm3948_sm.pdf]

## Supplementary Materials for

### **Characterization of a vaccine-elicited human antibody with sequence homology to VRC01-class antibodies that binds the C1C2 gp120 domain**

Matthew D. Gray, Junli Feng, Connor E. Weidle, Kristen W. Cohen, Lamar Ballweber-Fleming, Anna J. MacCamy, Crystal N. Huynh, Josephine J. Trichka, David Montefiori, Guido Ferrari, Marie Pancera\*, M. Juliana McElrath\*, Leonidas Stamatatos\*

\*Corresponding author. Email: [mpancera@fredhutch.org](mailto:mpancera@fredhutch.org) (M.P.); [jmcelrat@fredhutch.org](mailto:jmcelrat@fredhutch.org) (J.M.); [lstamata@fredhutch.org](mailto:lstamata@fredhutch.org) (L.S.)

Published 4 May 2022, *Sci. Adv.* **8**, eabm3948 (2022)  
DOI: [10.1126/sciadv.abm3948](https://doi.org/10.1126/sciadv.abm3948)

#### **This PDF file includes:**

Figs. S1 and S2  
Tables S1 and S2

**Figure S1**

## HVTN 100 Clinical Trial

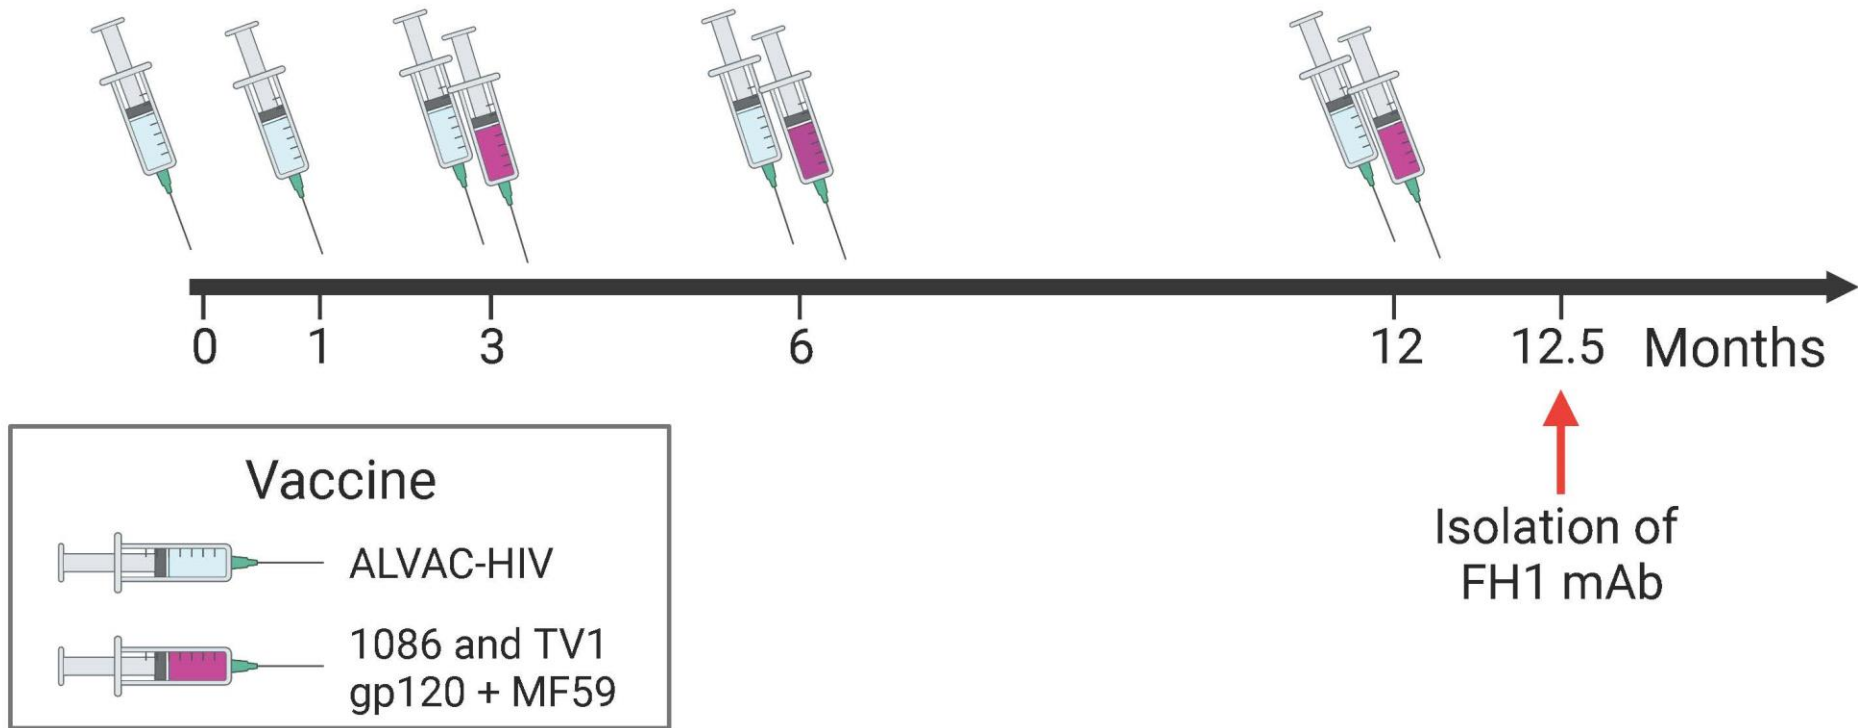

**S1. Timeline of vaccine administration in HVTN 100.** Numbers along the timeline indicate months since enrollment. Blue syringes denote administration of ALVAC, while red syringes denote administration of the bivalent rec gp120 mix (1086 and TV1). The red arrow indicates the visit (2 weeks post-5<sup>th</sup> immunization at visit 12) during which Env+ BCR repertoire analysis was performed and FH1 was isolated.

**Figure S2**

|                     |                | KD (M)   | KD Error | kon(1/Ms) | kon Error | kdis(1/s) | kdis Error | Full R <sup>2</sup> |
|---------------------|----------------|----------|----------|-----------|-----------|-----------|------------|---------------------|
| FH-1 Fab            | DMRScore gp120 | 2.64E-09 | 8.62E-11 | 2.43E+05  | 2.01E+03  | 2.79E-05  | 4.64E-06   | 0.9865              |
|                     | 1086 gp120     | 2.14E-10 | 2.71E-11 | 1.63E+05  | 2.23E+03  | 2.06E-05  | 3.05E-06   | 0.9904              |
|                     | eOD-GT8        | -        | -        | -         | -         | -         | -          | -                   |
| gl VRC01 Fab (3-20) | DMRScore gp120 | 6.09E-07 | 9.44E-09 | 9.67E+03  | 1.50E+02  | 2.48E-03  | 1.13E-05   | 0.9878              |
|                     | 1086 gp120     | -        | -        | -         | -         | -         | -          | -                   |
|                     | eOD-GT8        | 1.67E-09 | 5.48E-11 | 1.44E+05  | 1.51E+03  | 1.57E-04  | 4.04E-06   | 0.9715              |

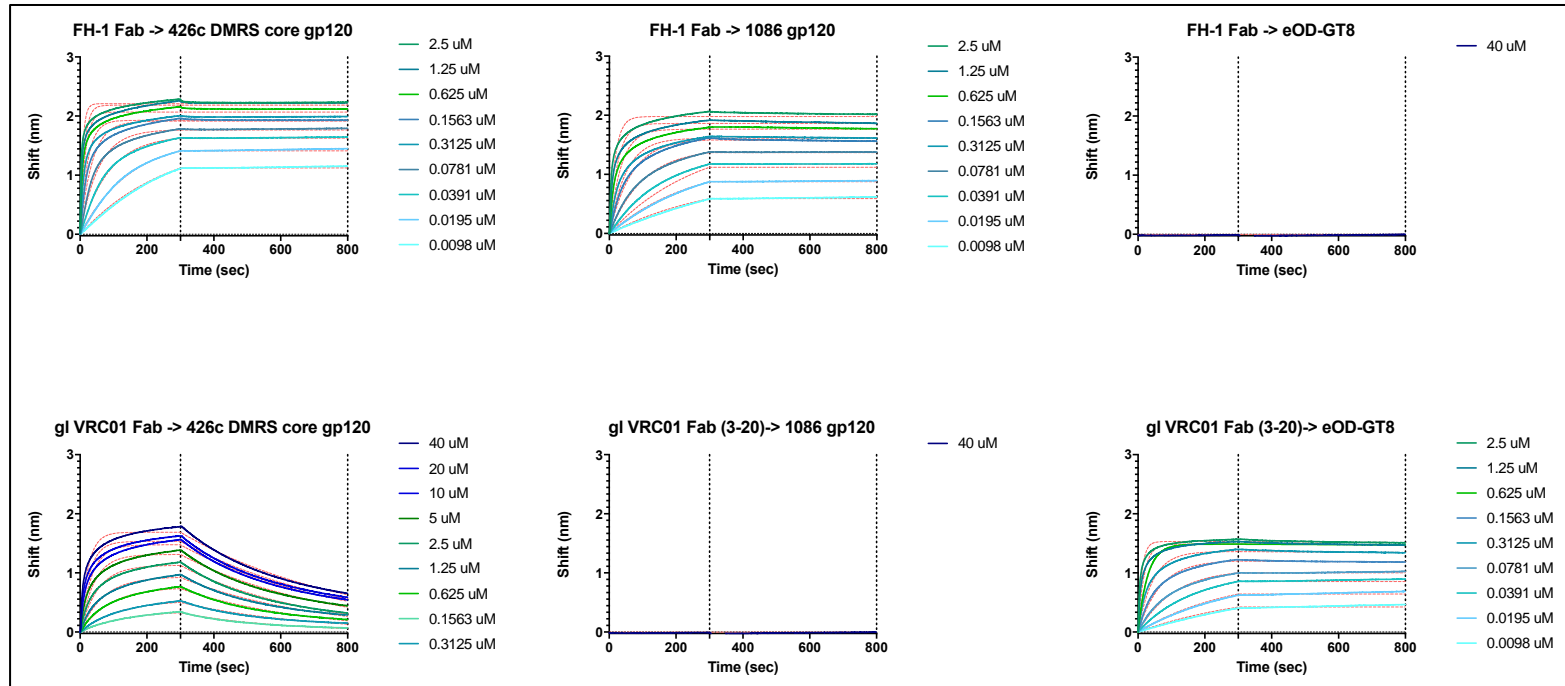

**S2. Kinetic analysis.** Kinetic analyses were performed by BLI using recombinant Fabs loaded onto FAB2G biosensors and 2-fold dilutions of the indicated Env monomers.

Supplementary Table 1 | Data collection and refinement statistics for FH1Fab+HXb2core

| FH1Fab+HXb2core                        |                                |
|----------------------------------------|--------------------------------|
| <b>Data collection</b>                 |                                |
| Space group                            | P1                             |
| Cell dimensions                        |                                |
| a, b, c (Å)                            | 103.361, 106.266, 113.219      |
| $\alpha$ , $\beta$ , $\gamma$ (°)      | 67.566, 76.674, 60.987         |
| Resolution (Å)                         | 50 - 3.5 (3.56 - 3.50)*        |
| $R_{\text{sym}}$ or $R_{\text{merge}}$ | 0.120 (0.511)*                 |
| $I/\sigma I$                           | 5.29 (1.19)*                   |
| Completeness (%)                       | 92.5 (69.3)*                   |
| Redundancy                             | 1.6 (1.4)*                     |
| $CC_{1/2}$                             | 0.950 (0.712)*                 |
| <b>Refinement</b>                      |                                |
| Resolution (Å)                         | 50.13 - 3.547 (3.674 - 3.547)* |
| No. reflections                        | 36171 (888)                    |
| $R_{\text{work}}/R_{\text{free}}$      | 25.64/29.27 (28.32/30.22)*     |
| No. atoms                              | 22151                          |
| Protein                                | 21280                          |
| Water                                  | 104                            |
| Ligand                                 | 767                            |
| B-factors (Å <sup>2</sup> )            | 78.88                          |
| Protein                                | 78.55                          |
| Water                                  | 36.57                          |
| Ligand                                 | 93.73                          |
| R.m.s deviations                       |                                |
| Bond lengths (Å)                       | 0.009                          |
| Bond angles (°)                        | 1.29                           |
| Ramachdran Favored %                   | 94.39                          |
| Ramachdran Outliers %                  | 0.00                           |
| MolProbity all-atoms<br>clashscore     | 6.49                           |
| <b>PDB ID</b>                          |                                |

\* Statistics for the highest-resolution shell are shown in parentheses.

Supplementary Table 2 | Detailed interactions between FH1 and HXB2core (from Pisa web server, www.ebi.ac.uk).

a. Detailed interactions of HXB2core and FH1 Heavy Chain.

| HXB2core  | HSDC | ASA    | BSA    | FH1 Heavy Chain | HSDC | ASA    | BSA    |
|-----------|------|--------|--------|-----------------|------|--------|--------|
| D:THR 51  |      | 104.27 | 1.73   | U:THR 30        |      | 46.24  | 1.48   |
| D:PHE 53  |      | 93.83  | 57.70  | U:GLY 31        |      | 54.92  | 38.35  |
| D:ALA 55  |      | 1.17   | 1.01   | U:TYR 33        | H    | 48.48  | 41.62  |
| D:ASP 57  |      | 103.06 | 6.85   | U:TRP 47        |      | 84.18  | 10.33  |
| D:ALA 58  | H    | 27.63  | 14.84  | U:TRP 50        |      | 42.68  | 19.83  |
| D:LYS 59  |      | 107.62 | 4.52   | U:ASN 52        |      | 25.35  | 17.79  |
| D:ALA 60  | H    | 89.46  | 65.57  | U:ASN 53        | H    | 106.21 | 31.12  |
| D:TYR 61  | H    | 166.38 | 130.38 | U:ASP 56        |      | 89.44  | 6.75   |
| D:ASP 62  |      | 55.32  | 2.25   | U:THR 57        |      | 47.77  | 8.83   |
| D:THR 63  |      | 118.64 | 17.66  | U:ASN 58        | H    | 63.67  | 53.72  |
| D:VAL 68  |      | 79.57  | 8.54   | U:TYR 59        | H    | 51.02  | 29.81  |
| D:THR 71  |      | 44.03  | 1.67   | U:ALA 60        |      | 21.99  | 4.43   |
| D:VAL 75  |      | 85.76  | 58.89  | U:GLN 61        |      | 178.08 | 66.44  |
| D:PRO 76  |      | 97.65  | 74.49  | U:GLN 64        |      | 120.29 | 35.01  |
| D:THR 77  | H    | 46.10  | 13.53  | U:TRP 95        |      | 20.75  | 19.38  |
| D:ASP 78  |      | 77.94  | 31.26  | U:TRP 97        |      | 187.86 | 144.66 |
| D:PRO 79  |      | 128.97 | 109.06 | U:GLY 98        |      | 34.47  | 6.05   |
| D:ASN 80  | H    | 109.70 | 33.69  | U:GLN 99        | H    | 165.23 | 109.64 |
| D:CYS 218 |      | 10.95  | 8.63   | U:TRP 100A      |      | 141.06 | 16.79  |
| D:PRO 220 |      | 19.47  | 11.94  |                 |      |        |        |
| D:ALA 221 | H    | 98.06  | 24.52  |                 |      |        |        |
| D:GLN 246 |      | 87.28  | 11.78  |                 |      |        |        |

| Hydrogen Bonds |           |                 |
|----------------|-----------|-----------------|
| HXB2core       | Dist. [Å] | FH1 Heavy Chain |
| D:ALA 60[N ]   | 3.27      | U:ASN 58[ OD1]  |
| D:TYR 61[N ]   | 3.33      | U:TYR 59[ O ]   |
| D:ALA 221[N ]  | 3.02      | U:GLN 99[ OE1]  |
| D:THR 77[ O ]  | 2.80      | U:TYR 33[ OH ]  |
| D:ASN 80[ OD1] | 3.66      | U:ASN 53[ ND2]  |
| D:ALA 58[ O ]  | 2.88      | U:ASN 58[ ND2]  |

b. Detailed interactions of HXB2core and FH1 Light Chain.

| HXB2core  | HSDC | ASA    | BSA    | FH1 Light Chain | HSDC | ASA    | BSA   |
|-----------|------|--------|--------|-----------------|------|--------|-------|
| D:THR 51  |      | 104.27 | 9.54   | V:GLU 1         |      | 147.36 | 11.74 |
| D:PHE 53  |      | 93.83  | 11.30  | V:ILE 2         |      | 49.88  | 33.80 |
| D:CYS 54  |      | 2.98   | 0.12   | V:GLN 27        | H    | 109.42 | 53.81 |
| D:ALA 58  |      | 27.63  | 1.11   | V:SER 27A       |      | 75.42  | 2.21  |
| D:ALA 60  |      | 89.46  | 15.90  | V:VAL 28        |      | 13.44  | 1.00  |
| D:VAL 68  |      | 79.57  | 8.61   | V:ARG 29        | HS   | 178.28 | 70.04 |
| D:THR 71  |      | 44.03  | 34.91  | V:TYR 32        |      | 117.06 | 76.44 |
| D:HIS 72  |      | 165.12 | 130.61 | V:HIS 90        |      | 20.68  | 20.37 |
| D:ALA 73  |      | 49.92  | 35.41  | V:MET 91        |      | 91.78  | 51.06 |
| D:CYS 74  |      | 28.91  | 19.26  | V:TYR 96        |      | 183.71 | 74.32 |
| D:VAL 75  |      | 85.76  | 26.88  | V:THR 97        |      | 42.63  | 10.16 |
| D:PRO 76  |      | 97.65  | 23.16  |                 |      |        |       |
| D:GLU 106 |      | 110.31 | 1.47   |                 |      |        |       |
| D:ASP 107 | HS   | 39.23  | 21.32  |                 |      |        |       |
| D:SER 110 |      | 51.85  | 7.10   |                 |      |        |       |
| D:GLN 114 | H    | 108.60 | 51.50  |                 |      |        |       |

| Hydrogen Bonds  |           |                 |
|-----------------|-----------|-----------------|
| HXB2core        | Dist. [Å] | FH1 Light Chain |
| D:GLN 114[ NE2] | 2.64      | V:GLN 27[ OE1]  |
| D:ASP 107[ OD1] | 3.50      | V:ARG 29[ NH2]  |

| Salt Bridges    |           |                 |
|-----------------|-----------|-----------------|
| HXB2core        | Dist. [Å] | FH1 Light Chain |
| D:ASP 107[ OD1] | 3.50      | V:ARG 29[ NH2]  |
